# Supplementary material for: A polymorphism of HMGA1 protects against proliferative diabetic retinopathy by impairing HMGA1-induced VEGFA expression
Source: PubMed Central journal article supplement (PMC5171873; doi:10.1038/srep39429), 2016-12-19
Supplement: srep39429-s1.pdf [file srep39429-s1.pdf]

**A polymorphism of *HMGA1* protects against proliferative diabetic retinopathy by impairing HMGA1-induced VEGFA expression**

Eusebio Chiefari<sup>1</sup>, Valeria Ventura<sup>1</sup>, Carmelo Capula<sup>2</sup>, Giorgio Randazzo<sup>3</sup>, Vincenzo Scoria<sup>3</sup>, Monica Fedele<sup>4</sup>, Biagio Arcidiacono<sup>1</sup>, Maria Teresa Nevolo<sup>1</sup>, Francesco Luciano Bilotta<sup>1</sup>, Michela Vitiello<sup>4</sup>, Camillo Palmieri<sup>3</sup>, Elio Gulletta<sup>1</sup>, Alfredo Fusco<sup>4,5</sup>, Daniela Foti<sup>1</sup>, Raffaella Vero<sup>2</sup> & Antonio Brunetti<sup>1\*</sup>

**Supplementary Information**

**Supplementary Figure**

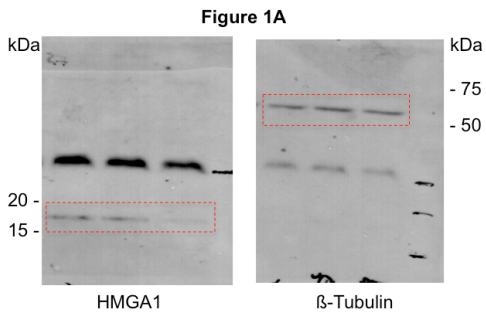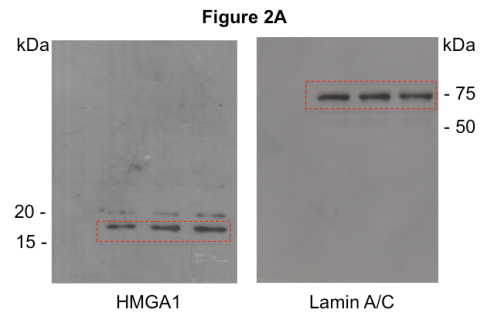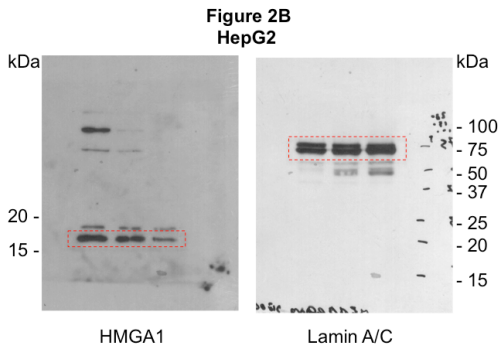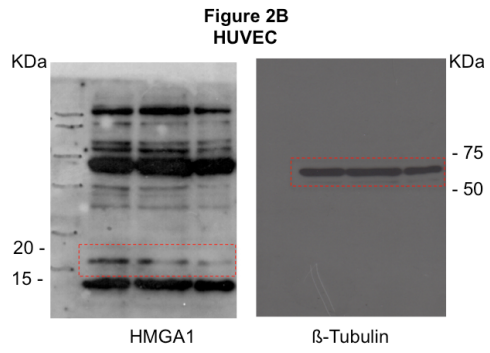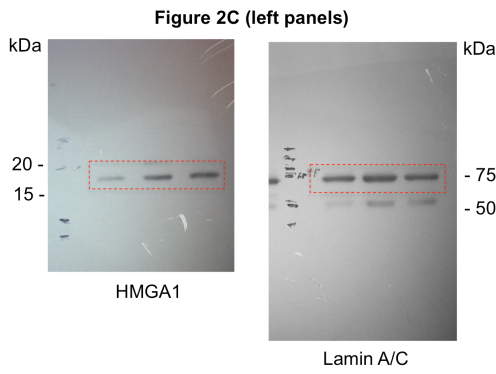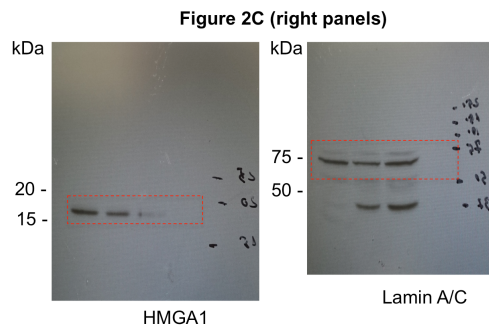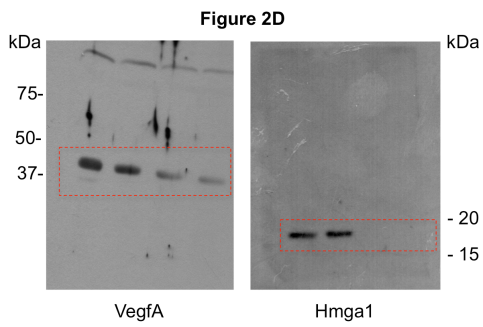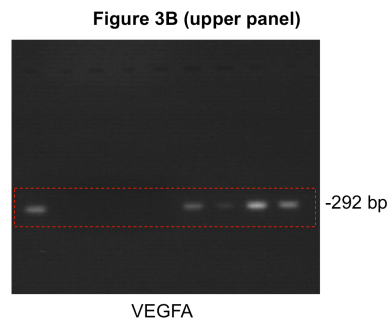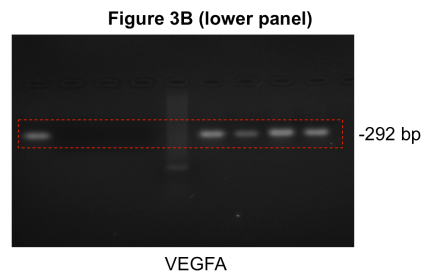

**Supplementary Fig. S1: Full-length Western blots and gels.** Western blots: Figure 1A, HMGA1,  $\beta$ -Tubulin; Figure 2A, HMGA1, Lamin A/C; Figure 2B (HepG2), HMGA1, Lamin A/C; Figure 2B (HUVEC), HMGA1,  $\beta$ -Tubulin; Figure 2C (left, ARPE-19), HMGA1, Lamin A/C; Figure 2C (right, ARPE-19), HMGA1, Lamin A/C; Figure 2D, VegfA, Hmga1. ChIP: Figure 3B, ChIP (HepG2) VEGFA; Figure 3B, ChIP (ARPE-19) VEGFA.
